1 **Inactivation of genes in oxidative respiration and iron acquisition pathways in pediatric**  
2 **clinical isolates of small-colony variant *Enterobacteriaceae***

3

4 Alexander L. Greninger<sup>a,b</sup>, Amin Addetia<sup>a,b</sup>, Yue Tao<sup>c</sup>, Amanda Adler<sup>b</sup>, and Xuan Qin<sup>a,b\*</sup>

5

6 <sup>a</sup>Department of Laboratory Medicine, University of Washington, Seattle, Washington, USA

7 <sup>b</sup>Seattle Children's Hospital, Seattle, Washington, USA.

8 <sup>c</sup>Shanghai Children's Medical Center, Translational Research Institute, Shanghai Jiao Tong

9 University School of Medicine, Shanghai, China, 200127

10

11

12

13

14

15

16

17

18

19

20

21 **Key words:** Small colony variants, *hemF*, *hemL*, *hemN*, auxotrophism, enterobactin.

22 **Running title:** Small-colony variant *Enterobacteriaceae*

23 \*Address correspondence to Xuan Qin, [xuan.qin@seattlechildrens.org](mailto:xuan.qin@seattlechildrens.org)

24

## 25 **Abstract**

26 Isolation of bacterial small colony variants (SCVs) from clinical specimens is not uncommon and  
27 can fundamentally change the outcome of the associated infections. Bacterial SCVs often  
28 emerge with their normal colony phenotype (NCV) co-isolates in the same sample. The genetic  
29 and biochemical basis of SCV emergence *in vivo* is not well understood in Gram-negative  
30 bacteria. In this study, we interrogated the causal genetic lesions of SCV growth in three pairs of  
31 NCV and SCV co-isolates of *Escherichia coli*, *Citrobacter freundii*, and *Enterobacter*  
32 *hormaechei*. We confirmed the isogenic basis of SCV emergence, as there were only 4 single  
33 nucleotide variants in SCV for *E. coli*, 5 in *C. freundii*, and 8 in *E. hormaechei*, with respect to  
34 their NCV co-isolate. In addition, a 10.2kb chromosomal segment containing 11 genes was  
35 deleted in the *E. hormaechei* SCV isolate. Intriguingly, each SCV had at least one coding  
36 change in a gene associated with bacterial oxidative respiration and another involved iron  
37 capture. Chemical rescue confirmed the causal role of heme biosynthesis in *E. coli* and *C.*  
38 *freundii* and lipoic acid in *E. hormaechei* SCV isolates. Genetic rescue restored normal growth  
39 under aerobic conditions for *fes* and *hemL* in *C. freundii*; *hemL* in *E. coli*; and *lipA* in *E.*  
40 *hormaechei* SCV isolates. Prototrophic growth in all 3 SCV *Enterobacteriaceae* species was  
41 unaffected under anaerobic culture conditions *in vitro*, illustrating how SCVs may persist *in vivo*  
42 by abandoning the highly energetic lifestyle in an iron-limiting environment. We propose that the  
43 selective loss of functions in oxidative respiration and iron acquisition is indicative of bacterial  
44 virulence attenuation for niche specialization and persistence *in vivo*.

45

## 46 **Importance**

47 Small colony variant (SCV) bacteria are routinely isolated in the clinical microbiology laboratory  
48 and can be notoriously difficult to treat. Most studies of the genetic underpinnings of SCV  
49 clinical isolates have examined *Staphylococcus aureus* and few have looked at how SCV  
50 emerge in Gram-negative bacteria. Here, we undertook detailed characterization of three

51 clinical isolates of SCV in *Escherichia coli*, *Citrobacter freundii*, and *Enterobacter hormaechei*  
52 along with their NCV co-isolates. Genomic sequencing revealed that each SCV had at least  
53 one coding change in genes involved in both bacterial oxidative respiration and iron capture.  
54 Chemical and genetic rescue revealed that both pathways could be responsible for the small  
55 colony variant. Each of the SCV showed no growth defect compared to NCV when incubated  
56 under anaerobic conditions, indicating a potential mechanism for SCV survival *in vivo*. We  
57 hypothesize that by retreating to anaerobic environments and avoiding escalating iron  
58 competition with the host, SCV have adapted to live to see another day.  
59

## 60 Introduction

61 To survive in the hostile host environment, bacteria may take two separate paths. The  
62 first and most commonly discussed is an arms race of iron competition and acquisition of  
63 antimicrobial resistance genes and pathogenicity factors (1–3). The alternative path is to adapt  
64 to persist through reductions in metabolic needs and an attenuated growth rate. The isolates  
65 that display this alternative phenotype are known as small colony variants (SCVs). Bacterial  
66 SCVs were first described in *Salmonella typhi* over a hundred years ago, prior to the antibiotic  
67 era (4). Isolation of SCVs is especially common in recurrent or persistent infections involving  
68 the respiratory tract, urinary tract, mid-ear, foreign body-related implants, and bone and joint (5–  
69 7). Emergence of bacterial SCVs from normal colony phenotype (NCV) parental isolates has  
70 been described in various clinical settings (4). Previously characterized bacterial SCV species  
71 include *Staphylococcus aureus*, *Escherichia coli*, *Neisseria gonorrhoeae*, *Stenotrophomonas*  
72 *maltophilia*, *Enterococcus*, and *Salmonella* (8–12). In addition to their decreased growth rate,  
73 bacterial SCV isolates are characterized by auxotrophism for components directly involved in  
74 the electron transfer chain, such as heme and menaquinone. SCVs may also display a  
75 nutritional dependency on thymidine or methionine (8, 13). From a treatment perspective, SCVs  
76 display a reduced response to antibiotics despite not carrying the associated antimicrobial  
77 resistance genes (4, 6, 14, 15). These degenerative changes allow SCV to persist *in vivo* in the  
78 unique environment and selection pressures of the infected host.

79 In the clinical microbiology laboratory, SCVs have been best characterized among *S.*  
80 *aureus* isolates. Common gene lesions in *S. aureus* SCVs have been seen in the heme,  
81 menaquinone, and thymidine biosynthetic pathways (6, 7). In clinical strains, disruptions in  
82 menaquinone biosynthesis have been associated with mutations in *menB*, *menC*, *menE* and  
83 *menF* (16). Laboratory-derived SCV *S. aureus*, *Salmonella typhimurium*, or *E. coli* with *hemA*,  
84 *hemB*, *hemD*, *hemL*, *lipA*, or *ctaA* mutations have been used for functional characterization of  
85 their changes in growth, metabolism, antimicrobial susceptibility, host invasion, and persistence

86 (17–21). In addition, mutations in transcriptional regulators in *Staphylococcus spp.* governing  
87 bacterial virulence factor expression, such as *agr*, *sarA*, *sigB*, and *relA*, have also been  
88 detected, suggesting attenuated cytotoxicity may enable bacterial persistence (7, 15, 22, 23).  
89 However, the basis of SCV formation and persistence in clinical isolates of Gram-negative  
90 bacteria has been less well characterized (10, 24).

91 Laboratory recognition, isolation, characterization and appropriate report of bacterial  
92 SCVs have suffered from a lack of established standards or guidelines. We previously reported  
93 a method practical in clinical laboratories for recognition and phenotypic characterization of SCV  
94 *S. maltophilia* from airway secretions of CF patients (8). Our lab has since implemented a  
95 systematic, culture-based approach that checks not only for colony variation in size, texture,  
96 color, or hemolysis, but also inability to grow on the standard Mueller-Hinton (MH) medium for  
97 susceptibility testing. Using this systematic approach, we identified 3 pairs of clinical NCV and  
98 SCV *Enterobacteriaceae* co-isolates from blood and urine cultures. We then used whole  
99 genome sequencing to screen for the molecular mechanisms distinguishing the SCVs from their  
100 NCV co-isolates. Confirmatory chemical and genetic rescues were performed on the SCVs to  
101 determine which mutations were causal for the altered phenotype.

102

## 103 **Materials and Methods**

### 104 *Isolation and characterization of SCV and NCV from clinical samples*

105 This study was approved by Seattle Children's Hospital Institutional Review Board. Three  
106 clinical NCV and SCV co-isolate pairs of *Escherichia coli*, *Citrobacter freundii*, and *Enterobacter*  
107 *hormaechei* were obtained from urine or blood cultures. Colony variants were separated by sub-  
108 cultures and bacterial species identification was performed using MALDI-TOF (Bruker biotyper,  
109 Bruker Daltonics, Inc.). Of note, the SCVs isolates described here did not grow on Mueller-  
110 Hinton agar and, thus, were reported in the patient's clinical record.

111

112 *Case histories*

113 *Case 1* - A previously healthy 6-week-old male with no history of hospitalization or receipt of  
114 antibiotics, presented to the emergency department with fever. His white blood cell count was  
115 elevated at 21,600/ml and a 2+ urine leukocyte esterase at the time of emergency visit. Given  
116 the patient's age, the patient was admitted for a rule out sepsis workup and the patient was  
117 started on empiric ceftriaxone. Urine cultures grew  $10^3$  -  $10^4$  cfu/mL *Escherichia coli* and  $10^3$  -  
118  $10^4$  cfu/mL SCV *Escherichia coli*. It was felt the urine culture did not support the diagnosis of  
119 UTI, and no additional antibiotics were indicated. The patient recovered fully.

120

121 *Case 2* - A 2-month-old female with right duplicated collection system presented to the  
122 emergency department with fever and foul smelling urine. The patient had experienced two  
123 urinary tract infections (UTIs) in the previous month (*Escherichia coli* and *Citrobacter* spp.) that  
124 were treated with amoxicillin and cephalexin, respectively. Given that the patient was currently  
125 receiving antibiotics for the previous Gram-negative UTI, the decision was made to admit the  
126 patient for likely IV antibiotic treatment, and the patient was started on empiric piperacillin-  
127 tazobactam. Her urine leukocyte esterase was 3+ with elevated red and white blood cells in  
128 urine at the time of culture. Urine cultures grew  $>10^5$  cfu/mL *Citrobacter* spp. and  $5 \cdot 10^4$  -  $10^5$   
129 cfu/mL SCV *Citrobacter* spp. and therapy was switched to ciprofloxacin. The patient completed  
130 14 days of therapy and recovered fully.

131

132 *Case 3* - A 6 year-old male with end stage renal disease managed with renal dialysis presented  
133 to dialysis clinic with fever, hypotension, and tachycardia. The patient had a history of multiple  
134 bloodstream infections treated with ceftazidime, rifampin, gentamicin, or intravenous  
135 trimethoprim-sulfamethoxazole. The patient was admitted to the hospital and started on empiric  
136 vancomycin and gentamicin. Blood cultures grew out *Enterobacter cloacae* and SCV  
137 *Enterobacter cloacae* by MALDI-TOF and therapy was switched to cefepime. Additionally, the

138 patient received ceftazidime line-lock therapy. The patient completed treatment and recovered  
139 fully. Though the isolates were resulted out as *E. cloacae*, they were later identified as *E.*  
140 *hormaechei* based on whole genome sequencing.

141

#### 142 *Whole genome sequencing of isolates*

143 DNA was extracted from using the MoBio UltraClean Microbial DNA Isolation kit. DNA  
144 was diluted to 1ng/uL and tagmented using quarter-volume reactions of Nextera XT with 15  
145 cycles of PCR amplification. Libraries were sequenced on a 2x300bp run on an Illumina MiSeq  
146 to achieve >1 million paired-end reads per sample. Reads were quality and adapter-trimmed  
147 using cutadapt (Q30) and de novo assembled using SPAdes using default parameters. Isolate  
148 details are reported in Table 1. For each pair of isolates, the NCV assembly was annotated  
149 using prokka and the reads from the paired isolate were mapped to the annotated assembly in  
150 Geneious v9.1. Variants were called using a minimum coverage of 7X and a minimum allele  
151 frequency of 75% (25). All variants were manually curated and variants within 10 bp of the edge  
152 of a contig were removed. All variants are displayed in Table 2 and all assemblies are available  
153 in NCBI BioProject PRJNA523376.

154

#### 155 *Recombinant bacterial strains, cloning, and plasmid preparation*

156 The ASKA library is a comprehensive GFP-tagged *E. coli* K-12 ORF plasmid library  
157 available from the National BioResource Project. The ASKA clone library is based on the *E. coli*  
158 K-12 strain AG1 and individual genes were cloned into the pCA24N vector (see Table 1) (26).  
159 The *E. coli* strain K-12 carrying pCA24N::*hemL*, *hemN*, *hemF*, *fes*, *fepC*, *araC*, *cysD*, *udk*, *pta*,  
160 *mprA*, *cusA*, *cusB*, *cusF*, *cspE*, *crcB*, *tatE*, *lipA*, *entD*, *tolC*, *rnr*, *hyfB* and pCA24N plasmid itself  
161 were obtained from the National BioResource Project. These *E. coli* strains were grown at 35° C  
162 for 18 h in TSY broth (Remel) with chloramphenicol (50µg/ml). Plasmids were isolated using the

163 ZymoPure Plasmid MiniPrep kit (Zymo Research) and then transformed into the clinical strains  
164 of *E.coli*, *C.freundii*, and *E. hormaechei*.

165 One of the affected genes, *pqqB*, in the SCV *E. hormaechei* isolates was unavailable  
166 from the ASKA strain library as an ortholog of this gene is not present in *E. coli* K-12. This gene  
167 was amplified from the NCV *E. hormaechei* isolate with CloneAmp HiFi polymerase (Takara)  
168 and the following primers: 5'-TCC GGC CCT GAG GCC TAT GGC CTT TAT TAA AGT CCT  
169 CGG TTC C-3' and 5'-TCC TTT ACT TGC GGC CGG GGT CCT GAA GCG TGA TGT TCA T-  
170 3'. These PCR products were cloned into pCA24N with a C-terminal GFP tag using the In-  
171 Fusion HD enzyme kit (Takara). Clones were selected on TSA plates with 50µg/ml  
172 chloramphenicol. Sanger sequencing was conducted on the resulting plasmid to confirm  
173 cloning.

174

#### 175 *Chemical and genetic rescue and cross-feeding*

176 Unlike their NCV co-isolates, SCVs cannot grow on M9 minimal media. We took  
177 advantage of this to study the additional nutritional requirements of SCVs and determine which  
178 mutations were casual for the auxotrophic phenotypes. To study the nutritional requirements of  
179 each SCV, a 0.5 McFarland solution of the isolate was plated on M9 media. A disk impregnated  
180 with heme (Remel), δ-aminolevulinic acid (Oxoid), L-glutamate (Sigma-Aldrich, 30 mM), lipoic  
181 acid (Sigma-Aldrich, 5 µg/mL) or pyrroloquinoline quinone (Sigma-Aldrich, 3 µM) was placed  
182 onto the media. For each chemical rescue, the corresponding NCV co-isolate and a blank disk  
183 were included as controls. The M9 plates were examined after incubation for 20-24 hours at  
184 35°C. Of note, NCV and SCV *C. freundii* carrying pCA24N were used in place of the  
185 untransformed NCV and SCV *C. freundii* due to the instability of the SCV isolate.

186 To examine the causal mutations responsible for the SCV phenotype, 0.5 McFarland  
187 solutions of each of the complemented strains were plated on to M9 media (Teknova). The M9  
188 plates were examined after incubation for 20-24 hours at 35°C. Lastly, we examined whether



189 the NCV could restore the growth of its SCV co-isolates by growing the strains adjacent to one  
190 another on M9 media. A 0.5 McFarland standard of each isolate was streaked on an M9 agar  
191 plate. This plate was examined after incubation for 20-24 hours at 35°C. Anaerobic cultures  
192 were also performed at 35°C using the AnaeroPack system (Mitsubishi Gas Chemical) and  
193 growth was observed at 48 hours.

194

#### 195 *Preparation of competent cells and electroporation*

196 To prepare electro-competent cells of *E.coli*, *C.freundii*, and *E. hormaechei*, 5 mL of TSY  
197 broth inoculated with a single colony was grown overnight with vigorous aeration (150 rpm/min)  
198 at 35° C. The following day, 30µl of overnight culture was diluted into 15ml of SOC media and  
199 grown at 37° C with constant shaking (180 rpm/min) until 0.5-0.8 OD600. Cells were harvested  
200 by centrifugation at 2000g for 10min at 4°C and washed twice with 10ml sterile ice-cold 10%  
201 glycerol. The supernatant was removed and the cell suspension was concentrated 50-fold in 3%  
202 glycerol.

203 For bacterial transformation, 100uL of electrocompetent cells were mixed with 100ng  
204 DNA in 0.1cm cuvettes. Electroporation was carried out using a Gene Pulser with the following  
205 parameters: 2.5 kV, 25 µF and 200 Ω for the NCV and SCV *E. coli*, NCV and SCV *E.*  
206 *hormaechei* and SCV *C. freundii*. The following parameters were used to transform the NCV *C.*  
207 *freundii*: 2.5 kV, 25 µF and 600 Ω. Immediately after pulsing, 0.9 ml of SOC media was added to  
208 each cuvette, the cell suspension was transferred to a test tube and then was incubated for  
209 30min at 37°C with constant shaking. Transformed clones were selected on TSA plates with  
210 50µg/ml chloramphenicol.

211

#### 212 *Data availability*

213 All assemblies are available from NCBI BioProject PRJNA523376

214 (<https://www.ncbi.nlm.nih.gov/bioproject/?term=PRJNA523376>).

## 215 **Results**

### 216 *Clinical cases and isolates*

217 Case histories are depicted in Figure 1 and described in the Materials and Methods.  
218 Briefly, the paired *E. coli* isolates were from a urine culture on a 6-week old otherwise healthy  
219 term male infant with fever. His white blood cell count was elevated at 21,600/ml and a 2+ urine  
220 leukocyte esterase at the time of emergency visit. The *C. freundii* isolates were from a urine  
221 culture on a 2-month old female infant with complex urological anomalies for duplicated  
222 collecting system and grade 3 vesicoureteral reflux. Her urine leukocyte esterase was 3+ with  
223 elevated red and white blood cells in urine at the time of culture. The *E. hormaechei* isolates  
224 were from multiple blood cultures, both arterial line and peripheral venous draw, spanning 3  
225 days on a 6-year old male child with end stage renal disease receiving hemodialysis and  
226 multiple prior bloodstream infections in the prior year. Of note, these isolates were originally  
227 resulted out as *E. cloacae* based on MALDI-TOF species identification.

228

### 229 *Antimicrobial resistance pattern is explained by ampC*

230 Co-isolation of both NCV and SCV of the *Enterobacteriaceae* strains were common to all  
231 3 cultures during routine culture workups. The antibiotic susceptibility pattern for the three NCV  
232 isolates is shown in Table 1 and followed expected patterns of resistance given the case  
233 histories. All three corresponding SCV isolates failed to grow on MH medium for susceptibility  
234 testing.

235 Genomic sequencing of the NCV isolates confirmed the presence of chromosomal  
236 *ampC* in all isolates, explaining the antibiotic susceptibility patterns recovered. Analysis of  
237 contigs with higher copy number revealed one small 4kb plasmid in *Escherichia coli*, three small  
238 2.5 - 4kb plasmids in *Enterobacter hormachei*, as well as >80kb of phage sequence in the  
239 *Citrobacter freundii* assembly but no plasmids. No specific antimicrobial resistance genes were  
240 contained on these plasmids.

241

242 *Whole genome sequencing of paired isolates reveals parsimonious variants accounting for*  
243 *small colony phenotype*

244 The *Escherichia coli* NCV assembly yielded 81 contigs >200 bp with an N50 of 360,223  
245 bp. Mapping of the *Escherichia coli* SCV reads to the NCV assembly yielded only 4 variants,  
246 including 2 variants in heme-related genes (Table 2). The 272-amino acid enterobactin  
247 siderophore transport system ATP-binding protein (*fepC*) gene had an internal stop codon at  
248 amino acid 169. The *hemL* gene had a W59R coding change and the *hemF* gene had an in-  
249 frame 6-bp deletion resulting in the loss of an arginine and glutamic acid at amino acids 132 and  
250 133. In addition, the transcriptional repressor *mprA* gene had a P84S coding change. No  
251 intergenic variants were recovered in the *Escherichia coli* SCV strain relative to the NCV strain.

252 Sequencing the *Citrobacter freundii* NCV strain yielded an assembly of 220 contigs >200  
253 bp with an N50 of 61,653 bp. Mapping of the *Citrobacter freundii* SCV reads to the NCV  
254 assembly yielded a total of 6 variants (Table 2). Two of these variants were related to heme-  
255 producing genes. Most notable among these were a 1 bp deletion in the glutamate-1-  
256 semialdehyde 2,1-aminomutase (*hemL*) gene that resulted in frame shift and stop codon at  
257 amino acid 75, as well as a premature stop codon at amino acid 918 of the enterochelin  
258 esterase (*fes*) gene. An additional heme-related variant included an intergenic mutation of  
259 unclear significance, 181 bp upstream of the aerobic coprohphyrinogen-III oxidase (*hemF*)  
260 gene. The three remaining variants resulted in coding changes in genes unrelated to heme  
261 production, including a Q303L mutation in the phosphate acetyltransferase (*pta*) gene, a P778T  
262 mutation in the major subunit precursor of the nitrate-inducible formate dehydrogenase (*fdnG*)  
263 gene, and a P7L mutation in an arabinose operon regulatory protein (*araC*) gene.

264 The *Enterobacter hormaechei* NCV assembly yielded 60 contigs longer than 200 bp.  
265 Mapping of the *Enterobacter hormaechei* SCV reads to the NCV assembly yielded 7 single  
266 nucleotide coding variants, one of which was in a gene related to heme production and one

267 involved in enterobactin synthesis. The oxygen-independent coproporphyrinogen-III oxidase  
268 (*hemN*) gene had a L366Q mutation, while the 4'-phosphopantetheinyl transferase (*entD*)  
269 involved in enterobactin synthesis complex had a D21A mutation. Multiple unrelated coding  
270 changes were found between the SCV and the NCV *Enterobacter hormaechei* strains, including  
271 a G291S mutation in the sulfate adenylyltransferase subunit 2 (*cysD*) gene, a C224W mutation  
272 in the coenzyme PQQ synthesis protein B (*pqqB*), a I362T mutation in the sensor histidine  
273 kinase (*rcsC*), a T403S mutation in the autoinducer 2 kinase (*IsrK*), and a D74H mutation in  
274 uridine kinase (*udk*). An intergenic G->A mutation 45 bp downstream of a hypothetical protein  
275 was also identified. A 10.2kb chromosomal deletion disrupting 11 genes was also found in the  
276 SCV assembly as compared to the NCV assembly. These genes included lipoyl synthase  
277 (*lipA*), cation efflux system locus (*cusA*, *cusB*, *cusF*), lipid A palmitoyltransferase (*pagP*), cold  
278 shock-like protein (*cspE*), putative fluoride ion transporter (*crcB*), Sec-independent protein  
279 translocase (*tatE*), 2-oxoglutaramate amidase (*yafV*), and two hypothetical proteins.

280

### 281 *Chemical and genetic rescue reveals causal SCV lesions*

282 To determine which of the above lesions were responsible for the defects in growth  
283 observed *in vitro*, we performed chemical and genetic rescue experiments on the three SCV  
284 clones. We also tested the ability of the NCV isolates to rescue SCV growth by cross-feeding to  
285 further confirm that a diffusible factor was responsible for limited growth. All experiments were  
286 performed on M9 minimal medium.

287 *E. coli* SCV prototrophic growth was restored with overexpression of *hemL*, but not  
288 *hemF*, *fepC*, or *mprA* (Figure 2a). SCV growth was also rescued by the presence of heme  
289 (Figure 2b) or  $\delta$ -aminolevulinic acid (ALA) (Figure S1a), but not L-glutamate, lipoic acid, or  
290 pyrroloquinolone quinone (PQQ) (Figures S1b-d). The SCV clone was also able to cross-feed  
291 from NCV (Figure 2c). These results are all consistent with the genetic deletion in *hemL* being  
292 responsible for the limited growth in our *E. coli* clone.

293 SCVs often revert to the NCV phenotype when serially passaged *in vitro*. We identified  
294 an *E. coli* SCV that reverted to a normal growth phenotype over the course of our study. We  
295 performed WGS on this SCV revertant to understand the individual mutations that resulted in  
296 wild type growth. This isolate had an NCV-like *hemL* sequence, but retained the SCV coding  
297 mutations in *hemF*, *fepC* and *mprA*. No additional mutations were observed in the reverted  
298 isolate. This further supports the results of our chemical and genetic rescues, and further  
299 highlights the importance of an intact *hemL* for normal growth.

300 Genetic and chemical rescue of *C. freundii* SCV growth showed similar results. *C.*  
301 *freundii* SCV prototrophic growth was restored with overexpression of *hemL* or *fes*, but not *araC*  
302 or *pta* (Figure 3a). The same chemical rescue results were seen as in the *E. coli* SCV, as heme  
303 (Figure 3b) or ALA (Figure S2a) were able to restore growth, but L-glutamate, lipoic acid, or  
304 PQQ failed to do so (Figure S2b-d). Moderate cross-feeding rescue with co-culture with the  
305 NCV clone was observed (Figure 2c). These results also indicate that deficiencies in heme  
306 synthesis and iron transport were responsible for the small colony growth phenotype seen in our  
307 *C. freundii* isolate.

308 Over the course of the rescue experiments, the *C. freundii* SCV also reverted to normal  
309 growth. This clone had NCV-like *fes* and *hemL* sequence, while the same SCV coding  
310 mutations were seen in *araC*, *fdnG*, and *pta*, as well as the intergenic mutation upstream of  
311 *hemF*. The *C. freundii* revertant also had a new R100H mutation in the cytochrome bd-I  
312 ubiquinol oxidase subunit 2 gene (*CydB*) relative to both the SCV and NCV clones. These  
313 results further confirm the genetic and chemical rescue performed above, illustrating the  
314 importance of the heme pathway for normal growth.

315 Finally, despite also containing lesions in the heme biosynthesis pathway, the *E.*  
316 *hormaechei* SCV produced a radically different pattern of chemical and genetic rescue. Here,  
317 overexpression of *lipA* was the only gene that yielded prototrophic growth (Figure 4a), while all  
318 other disrupted genes failed to rescue growth (Figures 4a, S3a-c). Complementation with lipoic

319 acid restored growth (Figure 4b) along with co-culture with *E. hormaechei* NCV (Figure 4c),  
320 while PQQ, heme and its biosynthetic intermediates L-glutamate and ALA failed to increase  
321 SCV growth (Figures S3d-g). These results conclusively demonstrate that disruption of the  
322 lipoylation pathway was responsible for the small growth phenotype in our *E. hormaechei* SCV  
323 isolate. We did not observe reversion to normal growth for the *E. hormaechei* SCV.

324

325 *SCV demonstrate prototrophic growth under anaerobic conditions*

326 Based on recurrent isolation of mutants in aerobic respiration pathways, along with the  
327 genetic and chemical rescue experiments demonstrating their causality, we hypothesized that  
328 SCV isolates might not demonstrate growth defects under anaerobic conditions. We cultured  
329 NCV and SCV isolates for each of the three species along with the transformed genetic rescue  
330 clones under anaerobic conditions for 48 hours. Anaerobic conditions rescued SCV growth in  
331 all cases (Figure 5a-c, S4h-j). These results were also independent of every genetic construct  
332 transformed.

333

## 334 **Discussion**

335 Here, we used genomic screening of paired isolates to understand the molecular  
336 mechanism of the small colony growth phenotype in Gram-negative bacteria encountered in the  
337 clinical microbiology laboratory as well as bacterial persistence *in vivo*. Unlike the NCVs, all  
338 three corresponding bacterial SCV isolates were auxotrophic, thus unable to grow in glucose  
339 only M9 medium. Using genetic, chemical rescue, as well as NCV cross-feeding, we found  
340 heme-production pathway lesions to be responsible for the SCV phenotype in two of the three  
341 isolates, while lipoic acid synthesis was responsible for the third. In the *E. coli* SCV, both W59R  
342 in *hemL* and two-amino acid deletion in *hemF* could impact heme production, but only  
343 complementation of *hemL* rescued growth on M9 media. In the SCV *C. freundii*, the truncation  
344 of *hemL* blocked ALA production. In *E. hormaechei* SCV, the *lipA* gene was interrupted by

345 large-scale genomic deletion and, correspondingly, complementation with *lipA* or lipoic acid  
346 restored prototrophic growth. Intriguingly, growth of the SCVs was not impaired under anaerobic  
347 conditions, consistent with the role of heme as an essential cofactor for the electron transport  
348 chain and lipoic acid's role in the Krebs cycle. Of note, this is the first report of whole genome  
349 comparison of paired NCV and SCV *Enterobacteriaceae* isolates associated with clinical  
350 bloodstream and urinary tract infections from pediatric patients and the first report of detection  
351 of gene lesions associated with bacterial iron acquisition. Gene truncations in enterochelin  
352 esterase (*fes*) in the SCV *C. freundii*, a putative siderophore transport system ATP-binding  
353 protein (*fepC*) in the SCV *E. coli*, and D21A in *entD* of *E. hormaechei* were novel findings with  
354 potential implications for bacterial lifestyle changes upon host selection. Notably, despite the  
355 significant genetic lesions recovered here – two truncations and a coding mutation never  
356 previously recovered in any *Enterobacter hormaechei* -- complementation with *fepC* and *entD*  
357 genes from *E. coli* failed to rescue prototrophic growth. Future work will need to characterize  
358 the effect of these mutations on protein function, as it is possible that these mutations result in  
359 dominant negative phenotypes.

360         The antibiotic exposure history or the choices for certain specific agent(s) used for the  
361 treatment in the 3 patients at the time could not explain a common pattern of selective pressure  
362 for the emergence of bacterial SCV. The patient underlying illnesses also ranged from the first  
363 episode of a potential *E. coli* urosepsis in a newborn, a recurrent *C. freundii* UTI in a 2-month  
364 old, and a presumed *E. hormaechei* occult renal system infection in a 6-year old patient with end  
365 stage renal disease pending kidney transplant. The second and the third cases both had  
366 significant prior antimicrobial exposure to multiple classes of agents with beta-lactams being the  
367 most common agent, but first new born case had no prior treatment ever. Although prior  
368 exposure to aminoglycosides or sulfamethoxazole-trimethoprim has been reported as selective  
369 pressure for selection of bacterial SCVs (4, 27), these two agents were only used in the third  
370 case. Therefore, antibiotic use alone may not be the major contributor for SCV selection.

371           Pairwise sequencing of the NCV and SCV genomes for SCV mutational characterization  
372 was based on the assumption that both NCV and SCV descended from the same strain. While  
373 the NCV is likely the closest representative of the parental strain, SCV diverged from this strain  
374 with distinctive mutations that were absent in NCV. The functional M9 growth studies *in vitro*  
375 have clearly demonstrated that deficiencies in bacterial synthesis of heme, lipoic acid, and/or  
376 iron acquisition apparatus were the primary contributors to SCV auxotrophism. Our analysis  
377 suggests that both the oxidative respiration and iron acquisition may be counter-selected by the  
378 host during the subacute or perhaps chronic infections. Moreover, the extent of SCV genomic  
379 mutations could vary depending on the clinical course of the infective illnesses. For example,  
380 the *E. coli* SCV urinary tract isolate from a 6 week old infant had 4 SNPs, the repeat *C. freundii*  
381 SCV urinary tract isolate from a 2 month old patient with urological anomalies had 6 SNPs, and  
382 the blood stream *E. hormaechei* SCV isolate from a 6 year old patient with end stage renal  
383 disease had 8 SNPs plus an 11-gene deletion.

384           The selective loss of oxidative respiration and iron acquisition we observed in the SCV  
385 isolates sharply contrasts with conventionally held beliefs about microbial pathogens. Rather  
386 than rapidly dividing and competing fiercely for iron, SCVs take a unique approach for evading  
387 the host defense response, which includes iron starvation and oxidative stress (1, 2). In  
388 response to the iron-limiting condition, it has been well documented that the bacterial ferric  
389 uptake regulator (Fur) system is activated to strengthen microbial ability to capture iron for  
390 energetic growth and pathogenesis (3). Regardless of iron availability, *Enterobacteriaceae* are  
391 facultative anaerobes, and they are fully capable of growth under various oxygen tensions with  
392 oxidative respiration being significantly more robust for energetic growth *in vitro* (28). Therefore,  
393 change in oxygen tension itself in the infected host environment may not be the major selective  
394 pressure for SCV development. Our finding of mutations in oxidative respiration related genes  
395 was consistent with the overwhelming reports of bacterial SCV deficiencies in heme,  
396 menaquinone, and lipoic acid synthesis (4, 21, 29, 30). Thus, an overarching impression of the



397 SCV degenerative mutations is their association with the essential elements of aerobic living  
398 which demands more iron (Figure 6) (31). The SCV isolates in this study, regardless of heme,  
399 lipoic acid, and/or iron transport deficiencies, were all able to grow anaerobically on M9 without  
400 nutrient supplementation. In fact, the selective loss of aerobic respiration under iron limiting and  
401 oxidative stress conditions is indicative of a microbial survival mechanism by “retreating to  
402 anaerobic habitats” in order to persist inside a single affected host without clonal dissemination  
403 into the host population (4, 32–34). Hence, resorting to anaerobic living may be an alternative  
404 response to iron limitation and oxidative stress (35). This alternative survival mechanism would  
405 be opposite to the well-known “superbugs” survival strategy of head-on iron competition and  
406 host population dissemination (36, 37). It also shares similarities with the immunoevasion  
407 strategies of tumors via hypoxia-induced immune exhaustion and T-cell anergy (38).

408 Iron is an essential nutrient for all forms of life (39). However, some free-living and  
409 obligate parasitic bacteria (e.g. *Borrelia burgdorferi*) employ a unique iron-independent redox-  
410 active metal such as manganese (Mn) to deal with oxidative stress, which allows them to  
411 bypass host iron defense (40). *E. coli* maintains a Mn-SOD (superoxide dismutase) system  
412 which is also regulated by Fur (41). All three SCV isolates contained an intact *sodA*, though  
413 expression and functional anti-oxidant activities were not examined. It is conceivable that the  
414 inactivation of iron uptake apparatus in bacterial SCVs may be indicative of bacterial transition  
415 into a parasitic lifestyle by means of iron bypass (40). Alternatively, the genetic lesions  
416 described here, particularly in *E. hormaechei*, could also be indicative of evolution to a more  
417 symbiotic lifestyle, as evidenced by the cross-feeding and gene decay (42). The co-obligate  
418 symbiotic bacterium *Serratia symbiotica*, known for its minimal genome (~143kb), has lost the  
419 ability to synthesize both heme and enterobactin and, additionally, lacks an iron uptake  
420 apparatus, similar to the changes observed in our SCV isolates (43, 44).

421 This study is limited by our focus only on mutations that were associated with  
422 auxotrophism on M9 medium without analyzing other mutations that could potentially affect

423 many other aspects of bacterial functions. For example, a ~10.2-kb deleted fragment in *E.*  
424 *hormaechei* SCV contained *cusF*, *cusB*, and *cusA* in tandem where CusCFBA is a membrane-  
425 bound proton antiporter for Cu/Ag efflux (45). As this efflux system carries out ATP-demanding  
426 activities, we speculate that this function encounters the same counter-selective pressure as a  
427 result of reduced ATP production assuming SCV anaerobic lifestyle. The exact host factor(s)  
428 that was critical for selection of SCV mutations is still unknown. Ideally, host selective factors  
429 could be identified if we could recreate the bacterial SCVs from the wildtype using host  
430 materials for bacterial growth *in vitro* or in animal models.

431 Antimicrobial resistance and iron competition as mechanisms for bacterial survival have  
432 attracted a great deal of interest (46). These isolates are now readily recognized in the clinical  
433 microbiology laboratory due to their robust growth and detectable resistance phenotypes using  
434 standard *in vitro* testing. Clinical isolates such as SCVs that lack these growth characteristics  
435 may be easily missed due to their small colony size and failure to grow on standard  
436 susceptibility testing media. The role of these alternatively pathways of survival in clinical  
437 infections may be significantly underestimated (30). Future work must address the totality of  
438 bacterial survival mechanisms, including mechanisms of bacteria persistence via resistance to  
439 host iron immunity and oxidative stress by means of anaerobiosis and iron bypass.

440

441 **Acknowledgements:** We thank National BioResource Project NBRP *E. coli* Strain, Japan for  
442 the *E. coli* plasmid library (<https://shigen.nig.ac.jp/ecoli/strain/>). We also thank Seattle Children's  
443 Microbiology team for their effort in standardization of bacterial SCV identification and quality  
444 documentation of these paired isolates.

445

## 446 References

- 447 1. Cassat JE, Skaar EP. 2013. Iron in infection and immunity. *Cell Host Microbe* 13:509–  
448 519.
- 449 2. Skaar EP. 2010. The battle for iron between bacterial pathogens and their vertebrate  
450 hosts. *PLoS Pathog* 6:e1000949.
- 451 3. Porcheron G, Dozois CM. 2015. Interplay between iron homeostasis and virulence: Fur  
452 and RyhB as major regulators of bacterial pathogenicity. *Vet Microbiol* 179:2–14.
- 453 4. Proctor RA, von Eiff C, Kahl BC, Becker K, McNamara P, Herrmann M, Peters G. 2006.  
454 Small colony variants: a pathogenic form of bacteria that facilitates persistent and recurrent  
455 infections. *Nat Rev Microbiol* 4:295–305.
- 456 5. Grant SS, Hung DT. 2013. Persistent bacterial infections, antibiotic tolerance, and the  
457 oxidative stress response. *Virulence* 4:273–283.
- 458 6. Garcia LG, Lemaire S, Kahl BC, Becker K, Proctor RA, Denis O, Tulkens PM, Van  
459 Bambeke F. 2013. Antibiotic activity against small-colony variants of *Staphylococcus aureus*:  
460 review of in vitro, animal and clinical data. *J Antimicrob Chemother* 68:1455–1464.
- 461 7. Kahl BC, Becker K, Löffler B. 2016. Clinical Significance and Pathogenesis of  
462 Staphylococcal Small Colony Variants in Persistent Infections. *Clin Microbiol Rev* 29:401–427.
- 463 8. Anderson SW, Stapp JR, Burns JL, Qin X. 2007. Characterization of Small-Colony-  
464 Variant *Stenotrophomonas maltophilia* Isolated from the Sputum Specimens of Five Patients  
465 with Cystic Fibrosis. *J Clin Microbiol* 45:529–535.
- 466 9. Wellinghausen N, Chatterjee I, Berger A, Niederfuehr A, Proctor RA, Kahl BC. 2009.  
467 Characterization of clinical *Enterococcus faecalis* small-colony variants. *J Clin Microbiol*  
468 47:2802–2811.
- 469 10. Roggenkamp A, Sing A, Hornef M, Brunner U, Autenrieth IB, Heesemann J. 1998.  
470 Chronic prosthetic hip infection caused by a small-colony variant of *Escherichia coli*. *J Clin*  
471 *Microbiol* 36:2530–2534.
- 472 11. Säsärman A, Sanderson KE, Surdeanu M, Sonea S. 1970. Hemin-deficient mutants of  
473 *Salmonella typhimurium*. *J Bacteriol* 102:531–536.
- 474 12. Morton HE, Shoemaker J. 1945. The Identification of *Neisseria gonorrhoeae* by Means  
475 of Bacterial Variation and the Detection of Small Colony Forms in Clinical Material. *J Bacteriol*  
476 50:585–587.
- 477 13. Kriegeskorte A, Block D, Drescher M, Windmüller N, Mellmann A, Baum C, Neumann C,  
478 Lorè NI, Bragonzi A, Liebau E, Hertel P, Seggewiss J, Becker K, Proctor RA, Peters G, Kahl  
479 BC. 2014. Inactivation of *thyA* in *Staphylococcus aureus* attenuates virulence and has a strong  
480 impact on metabolism and virulence gene expression. *MBio* 5:e01447-01414.
- 481 14. Choby JE, Skaar EP. 2016. Heme Synthesis and Acquisition in Bacterial Pathogens. *J*  
482 *Mol Biol* 428:3408–3428.
- 483 15. Dean MA, Olsen RJ, Long SW, Rosato AE, Musser JM. 2014. Identification of point  
484 mutations in clinical *Staphylococcus aureus* strains that produce small-colony variants  
485 auxotrophic for menadione. *Infect Immun* 82:1600–1605.
- 486 16. Lannergård J, von Eiff C, Sander G, Cordes T, Seggewiss J, Peters G, Proctor RA,  
487 Becker K, Hughes D. 2008. Identification of the genetic basis for clinical menadione-auxotrophic  
488 small-colony variant isolates of *Staphylococcus aureus*. *Antimicrob Agents Chemother*  
489 52:4017–4022.
- 490 17. Clements MO, Watson SP, Poole RK, Foster SJ. 1999. *CtaA* of *Staphylococcus aureus*  
491 is required for starvation survival, recovery, and cytochrome biosynthesis. *J Bacteriol* 181:501–  
492 507.
- 493 18. Pränting M, Andersson DI. 2011. Escape from growth restriction in small colony variants  
494 of *Salmonella typhimurium* by gene amplification and mutation. *Mol Microbiol* 79:305–315.

- 495 19. von Eiff C, Heilmann C, Proctor RA, Woltz C, Peters G, Götz F. 1997. A site-directed  
496 *Staphylococcus aureus* hemB mutant is a small-colony variant which persists intracellularly. *J*  
497 *Bacteriol* 179:4706–4712.
- 498 20. Ramiro RS, Costa H, Gordo I. 2016. Macrophage adaptation leads to parallel evolution  
499 of genetically diverse *Escherichia coli* small-colony variants with increased fitness in vivo and  
500 antibiotic collateral sensitivity. *Evol Appl* 9:994–1004.
- 501 21. Santos V, Hirshfield I. 2016. The Physiological and Molecular Characterization of a  
502 Small Colony Variant of *Escherichia coli* and Its Phenotypic Rescue. *PLoS ONE* 11:e0157578.
- 503 22. Sifri CD, Baresch-Bernal A, Calderwood SB, von Eiff C. 2006. Virulence of  
504 *Staphylococcus aureus* small colony variants in the *Caenorhabditis elegans* infection model.  
505 *Infect Immun* 74:1091–1096.
- 506 23. Painter KL, Strange E, Parkhill J, Bamford KB, Armstrong-James D, Edwards AM. 2015.  
507 *Staphylococcus aureus* adapts to oxidative stress by producing H<sub>2</sub>O<sub>2</sub>-resistant small-colony  
508 variants via the SOS response. *Infect Immun* 83:1830–1844.
- 509 24. Tada T, Uechi K, Nakasone I, Miyazato Z, Shinzato T, Shimada K, Tsuchiya M, Kirikae  
510 T, Fujita J. 2018. A hemin auxotrophic *Enterobacter cloacae* clinical isolate with increased  
511 resistance to carbapenems and aminoglycosides. *J Med Microbiol* 67:29–32.
- 512 25. Greninger AL, Streithorst J, Golden JA, Chiu CY, Miller S. 2017. Complete genome  
513 sequence of sequential *Pandoraea apista* isolates from the same cystic fibrosis patient supports  
514 a model of chronic colonization with in vivo strain evolution over time. *Diagn Microbiol Infect Dis*  
515 87:1–6.
- 516 26. Kitagawa M, Ara T, Arifuzzaman M, Ioka-Nakamichi T, Inamoto E, Toyonaga H, Mori H.  
517 2005. Complete set of ORF clones of *Escherichia coli* ASKA library (a complete set of *E. coli* K-  
518 12 ORF archive): unique resources for biological research. *DNA Res* 12:291–299.
- 519 27. Melter O, Radojevič B. 2010. Small colony variants of *Staphylococcus aureus*--review.  
520 *Folia Microbiol (Praha)* 55:548–558.
- 521 28. Gonzalez JE, Long CP, Antoniewicz MR. 2017. Comprehensive analysis of glucose and  
522 xylose metabolism in *Escherichia coli* under aerobic and anaerobic conditions by <sup>13</sup>C metabolic  
523 flux analysis. *Metab Eng* 39:9–18.
- 524 29. von Eiff C, Peters G, Becker K. 2006. The small colony variant (SCV) concept -- the role  
525 of staphylococcal SCVs in persistent infections. *Injury* 37 Suppl 2:S26-33.
- 526 30. Park YJ, Le Phuong N, Pinto NA, Kwon MJ, D'Souza R, Byun J-H, Sung H, Yong D.  
527 2018. Urinary tract infection caused by a small colony variant form of capnophilic *Escherichia*  
528 *coli* leading to misidentification and non-reactions in antimicrobial susceptibility tests. *Antimicrob*  
529 *Resist Infect Control* 7:139.
- 530 31. Beauchene NA, Myers KS, Chung D, Park DM, Weisnicht AM, Keleş S, Kiley PJ. 2015.  
531 Impact of Anaerobiosis on Expression of the Iron-Responsive Fur and RyhB Regulons. *MBio*  
532 6:e01947-01915.
- 533 32. Imlay JA. 2006. Iron-sulphur clusters and the problem with oxygen. *Mol Microbiol*  
534 59:1073–1082.
- 535 33. Qin X. 2016. Chronic pulmonary pseudomonal infection in patients with cystic fibrosis: A  
536 model for early phase symbiotic evolution. *Crit Rev Microbiol* 42:144–157.
- 537 34. Proctor RA, Kriegeskorte A, Kahl BC, Becker K, Löffler B, Peters G. 2014.  
538 *Staphylococcus aureus* Small Colony Variants (SCVs): a road map for the metabolic pathways  
539 involved in persistent infections. *Front Cell Infect Microbiol* 4:99.
- 540 35. Dukan S, Nyström T. 1999. Oxidative stress defense and deterioration of growth-  
541 arrested *Escherichia coli* cells. *J Biol Chem* 274:26027–26032.
- 542 36. Miller HK, Auerbuch V. 2015. Bacterial iron-sulfur cluster sensors in mammalian  
543 pathogens. *Metallomics* 7:943–956.

- 544 37. Peltier F, Choquet M, Decroix V, Adjidé CC, Castelain S, Guiheneuf R, Pluquet E. 2019.  
545 Characterization of a multidrug-resistant *Klebsiella pneumoniae* ST607-K25 clone responsible  
546 for a nosocomial outbreak in a neonatal intensive care unit. *J Med Microbiol* 68:67–76.
- 547 38. Noman MZ, Hasmim M, Messai Y, Terry S, Kieda C, Janji B, Chouaib S. 2015. Hypoxia:  
548 a key player in antitumor immune response. A Review in the Theme: Cellular Responses to  
549 Hypoxia. *Am J Physiol, Cell Physiol* 309:C569-579.
- 550 39. Cairo G, Bernuzzi F, Recalcati S. 2006. A precious metal: Iron, an essential nutrient for  
551 all cells. *Genes Nutr* 1:25–39.
- 552 40. Posey JE, Gherardini FC. 2000. Lack of a role for iron in the Lyme disease pathogen.  
553 *Science* 288:1651–1653.
- 554 41. Fee JA. 1991. Regulation of *sod* genes in *Escherichia coli*: relevance to superoxide  
555 dismutase function. *Mol Microbiol* 5:2599–2610.
- 556 42. Gil R, Sabater-Muñoz B, Latorre A, Silva FJ, Moya A. 2002. Extreme genome reduction  
557 in *Buchnera* spp.: toward the minimal genome needed for symbiotic life. *Proc Natl Acad Sci*  
558 *USA* 99:4454–4458.
- 559 43. Burke GR, Moran NA. 2011. Massive genomic decay in *Serratia symbiotica*, a recently  
560 evolved symbiont of aphids. *Genome Biol Evol* 3:195–208.
- 561 44. Manzano-Marín A, Latorre A. 2014. Settling down: the genome of *Serratia symbiotica*  
562 from the aphid *Cinara tujafilina* zooms in on the process of accommodation to a cooperative  
563 intracellular life. *Genome Biol Evol* 6:1683–1698.
- 564 45. Franke S, Grass G, Rensing C, Nies DH. 2003. Molecular analysis of the copper-  
565 transporting efflux system *CusCFBA* of *Escherichia coli*. *J Bacteriol* 185:3804–3812.
- 566 46. Broberg CA, Palacios M, Miller VL. 2014. *Klebsiella*: a long way to go towards  
567 understanding this enigmatic jet-setter. *F1000Prime Rep* 6:64.  
568

Table 1 - Antibiotic susceptibility by disk diffusion of normal colony variant for each isolate based on CLSI M100-S29 breakpoints.

| Disk content                      | Zone Diameter |       |      | <i>Escherichia coli</i> | <i>Citrobacter freundii</i> | <i>Enterobacter hormaechei</i> |
|-----------------------------------|---------------|-------|------|-------------------------|-----------------------------|--------------------------------|
|                                   | S*            | I*    | R*   | Result (mm)             | Result (mm)                 | Result (mm)                    |
| Ampicillin (10 µg)                | ≥ 17          | 14-16 | ≤ 13 | R (15)                  | R (6)                       | R (6)                          |
| Augmentin (20/10 µg)              | ≥ 18          | 14-17 | ≤ 13 | I (17)                  | R (7)                       | R (10)                         |
| cefazolin                         | ≥ 23          | 20-22 | ≤ 19 | I (21)                  | R (6)                       | R (6)                          |
| cefazolin (urine breakpoint)      | ≥ 15          |       | ≤ 14 | S (21)                  | R (6)                       | R (6)                          |
| ceftazidime                       | ≥ 21          | 18-20 | ≤ 17 | S (31)                  | R (14)                      | S (27)                         |
| ceftriaxone                       | ≥ 23          | 20-22 | ≤ 19 | S (32)                  | R (16)                      | S (27)                         |
| cefuroxime (IV)                   | ≥ 18          | 14-17 | ≤ 13 | S (20)                  | R (8)                       | R (6)                          |
| cefepime                          | ≥ 25          | 19-24 | ≤ 18 | S (33)                  | S (32)                      | S (33)                         |
| piperacillin-tazobactam           | ≥ 21          | 18-20 | ≤ 17 | S (28)                  | S (21)                      | S (27)                         |
| meropenem                         | ≥ 23          | 20-22 | ≤ 19 | S (30)                  | S (29)                      | S (28)                         |
| ciprofloxacin                     | ≥ 31          | 21-30 | ≤ 20 | S (33)                  | I (23)                      | S (34)                         |
| gentamicin                        | ≥ 15          | 13-14 | ≤ 12 | S (23)                  | S (23)                      | S (20)                         |
| nitrofurantoin (urine breakpoint) | ≥ 17          | 15-16 | ≤ 14 | S (26)                  | S (21)                      | N.D.                           |
| trimethoprim-sulfamethoxazole     | ≥ 16          | 11-15 | ≤ 10 | S (29)                  | S (27)                      | S (25)                         |

\*"S" sensitive, "I" intermediate, and "R" resistant.

Table 2. Genomic variants isolated from paired clinical co-isolates of *Escherichia coli*, *Citrobacter freundii*, *Enterobacter hormaechei*.

| Location                              | CDS<br>Codon<br>Number | CDS<br>Position | Nucleotide<br>Change | Protein<br>Effect | Coverage | Product                                                                                | Genetic<br>restoration<br>on M9? |
|---------------------------------------|------------------------|-----------------|----------------------|-------------------|----------|----------------------------------------------------------------------------------------|----------------------------------|
| <b><i>Escherichia coli</i></b>        |                        |                 |                      |                   |          |                                                                                        |                                  |
| hemF                                  | ER232--                | 694             | -GAGCGC              | Deletion          | 142      | Coproporphyrinogen-III oxidase, aerobic                                                | No                               |
| hemL                                  | W59R                   | 175             | A -> T               | Substitution      | 117      | Glutamate-1-semialdehyde 2,1-aminomutase<br>putative siderophore transport system ATP- | Yes                              |
| fepC                                  | E169X                  | 505             | C -> A               | Truncation        | 132      | binding protein YusV                                                                   | No                               |
| mprA                                  | P84S                   | 250             | G -> A               | Substitution      | 147      | Transcriptional repressor MprA                                                         | No                               |
| <b><i>Citrobacter freundii</i></b>    |                        |                 |                      |                   |          |                                                                                        |                                  |
| 181bp upstream of<br>hemF             | N/A                    | N/A             | A -> C               | N/A               | 26       | N/A                                                                                    |                                  |
| hemL                                  |                        | 18              | 54 -G                | Frame Shift       | 44       | Glutamate-1-semialdehyde 2,1-aminomutase                                               | Yes                              |
| fes                                   | C306X                  | 918             | T -> A               | Truncation        | 67       | Enterochelin esterase                                                                  | Yes                              |
| araC                                  | P7L                    | 20              | C -> T               | Substitution      | 10       | Arabinose operon regulatory protein                                                    | No                               |
| fdnG                                  | P778T                  | 2,332           | C -> A               | Substitution      | 51       | Formate dehydrogenase, nitrate-inducible,<br>major subunit precursor                   | N.D.                             |
| pta                                   | Q303L                  | 908             | T -> A               | Substitution      | 72       | Phosphate acetyltransferase                                                            | No                               |
| <b><i>Enterobacter hormaechei</i></b> |                        |                 |                      |                   |          |                                                                                        |                                  |
| hemN                                  | L366Q                  | 1,097           | A -> T               | Substitution      | 34       | Oxygen-independent coproporphyrinogen-III<br>oxidase 1                                 | No                               |
| pqqB                                  | C224W                  | 672             | C -> A               | Substitution      | 57       | Coenzyme PQQ synthesis protein B<br>4'-phosphopantetheinyl transferase                 | No                               |
| entD                                  | D21A                   | 62              | C -> A               | Substitution      | 44       | (enterobacin biosynthesis complex)                                                     | No                               |
| cysD                                  | G291S                  | 871             | T -> C               | Substitution      | 41       | Sulfate adenylyltransferase subunit 2                                                  | No                               |
| lsrK                                  | T403S                  | 1,207           | A -> T               | Substitution      | 35       | Autoinducer 2 kinase LsrK                                                              | No                               |
| rscC                                  | I362T                  | 1,085           | G -> A               | Substitution      | 38       | Sensor histidine kinase RcsC                                                           | No                               |
| udk                                   | D74H                   | 220             | G -> C               | Substitution      | 62       | Uridine kinase                                                                         | No                               |

**Deletions of the following genes:**

|                      |                                             |      |
|----------------------|---------------------------------------------|------|
| lipA                 | Lipoyl Synthase                             | Yes  |
| cusF                 | Cation efflux system protein                | No   |
| cusB                 | Cation efflux system protein                | No   |
| cusA                 | Cation efflux system protein                | No   |
| pagP                 | Lipid A palmitoyltransferase                | N.D. |
| cspE                 | Cold shock-like protein                     | No   |
| crcB                 | Putative fluoride ion transporter           | No   |
| yafV                 | 2-oxoglutaramate amidase                    | N.D. |
| tatE                 | Sec-independent protein translocase protein | No   |
| hypothetical protein | hypothetical protein                        | N.D. |



### a) Case 1

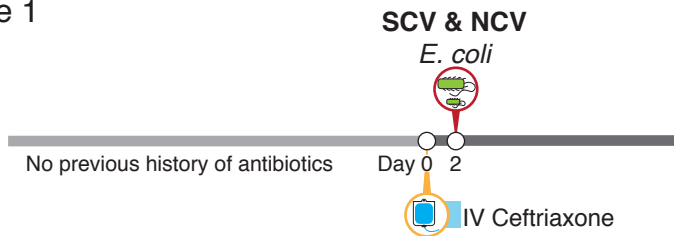

### b) Case 2

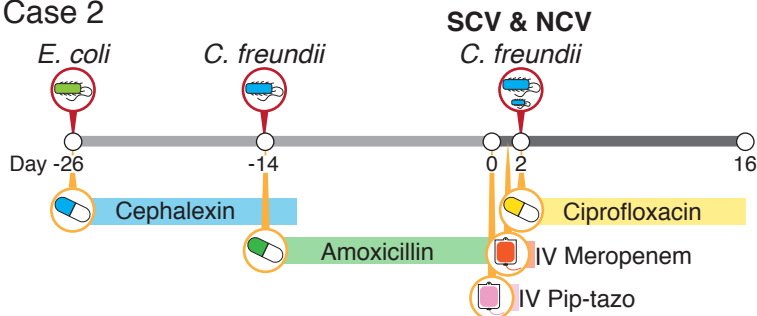

### c) Case 3

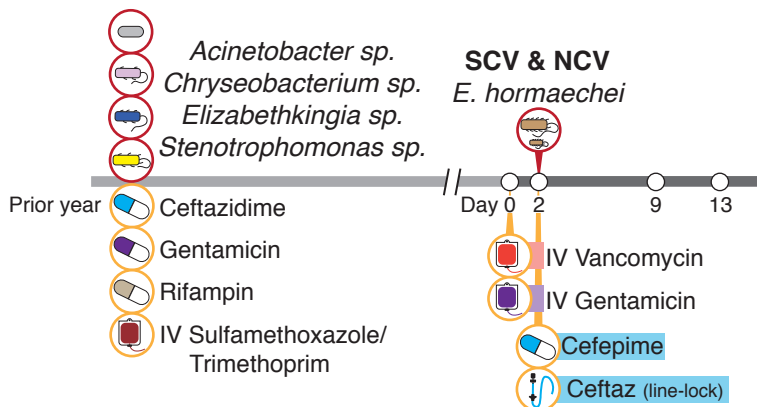

Figure 1 – Case histories. Relevant past clinical microbiological and antibiotic selective pressures are indicated in the line histories for the isolation of NCV and SCV in *Escherichia coli* (a), *Citrobacter freundii* (b), and *Enterobacter hormaechei* (c).

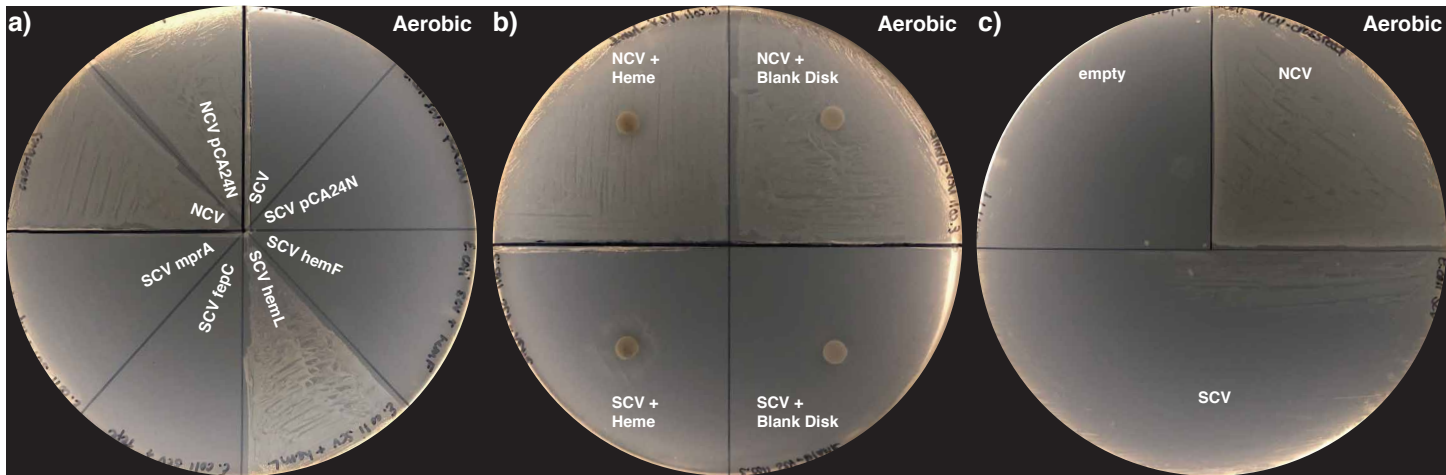

**Figure 2** - Heme biosynthesis lesion as cause of small colony phenotype in *Escherichia coli* isolated from urinary tract infection. Genomic sequencing of the paired NCV and SCV isolates revealed genomic lesions in *fepC*, *hemF*, *hemL*, and *mprA*. A) Only genetic rescue with *hemL* rescued normal growth from the *Escherichia coli* SCV. B) Chemical rescue with heme partially restored normal growth in *Escherichia coli* SCV. C) Cross-feeding from *Escherichia coli* NCV partially restores growth of SCV, consistent with a diffusible factor required for growth. All plates in this figure were incubated under aerobic conditions.

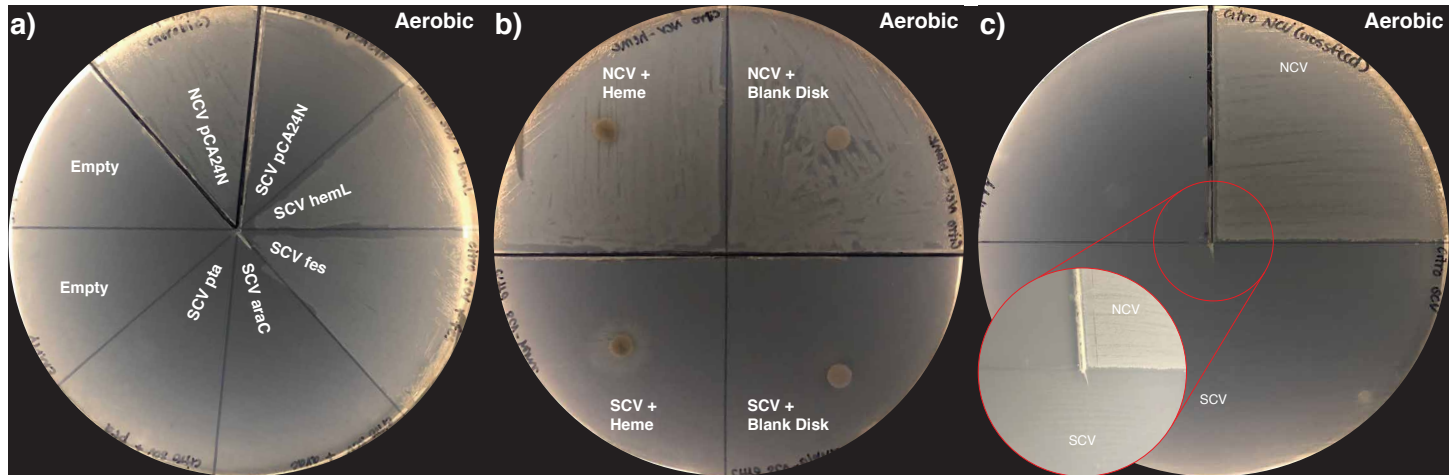

**Figure 3** - Heme biosynthesis along with iron availability lesion as cause of small colony phenotype in *Citrobacter freundii* isolated from urinary tract infection. Genomic sequencing of the paired NCV and SCV isolates revealed genomic lesions in *araC*, *fdnG*, *fes*, *hemL*, *pta*, and in the intergenic region upstream of the *hemF* gene. A) Genetic rescue with *fes* and *hemL* rescued normal growth from the *Citrobacter freundii* SCV. B) Chemical rescue with heme restored normal growth in *Citrobacter freundii* SCV. C) Cross-feeding from *Citrobacter freundii* NCV partially restores growth of SCV, consistent with a diffusible factor required for growth. All plates in this figure were incubated under aerobic conditions.

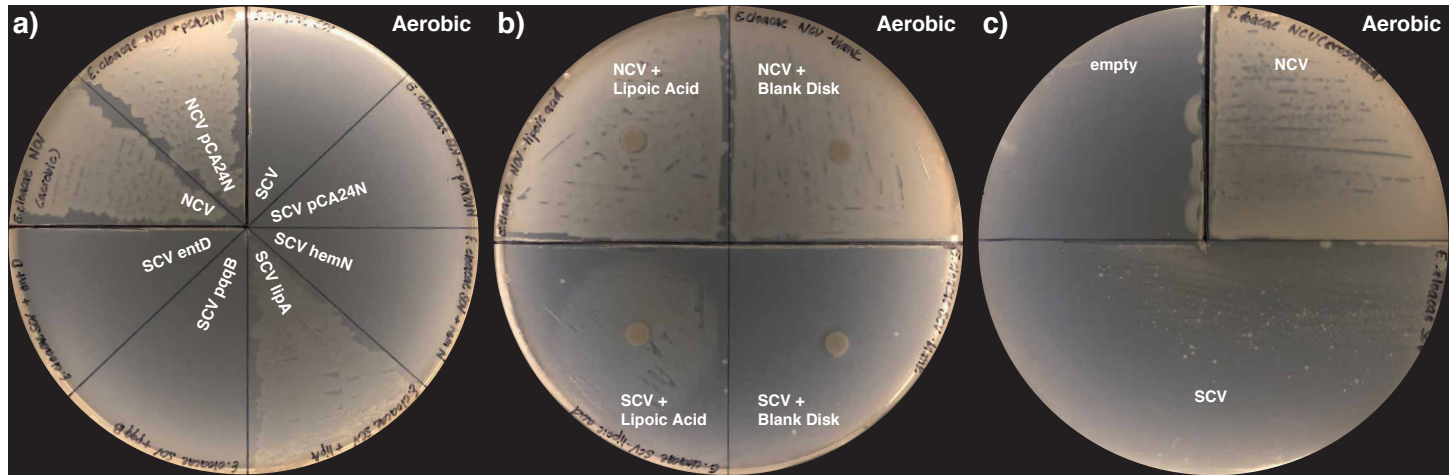

**Figure 4** - Lipoic acid biosynthesis as cause of small colony phenotype in *Enterobacter hormaechei* isolated from a bloodstream infection in a patient with end-stage renal disease. Genomic sequencing of the paired NCV and SCV isolates revealed multiple genomic lesions including single nucleotide substitutions in *entD*, *hemN*, and *pqqB* along with large-scale rearrangements leading to disruption of the *lipA* gene. A) Genetic rescue with *lipA* restored normal growth from the *Enterobacter hormaechei* SCV. B) Chemical rescue with lipoic acid restored normal growth in *Enterobacter hormaechei* SCV. C) Cross-feeding from *Enterobacter hormaechei* NCV restores growth of SCV, consistent with a diffusible factor required for growth. All plates in this figure were incubated under aerobic conditions.

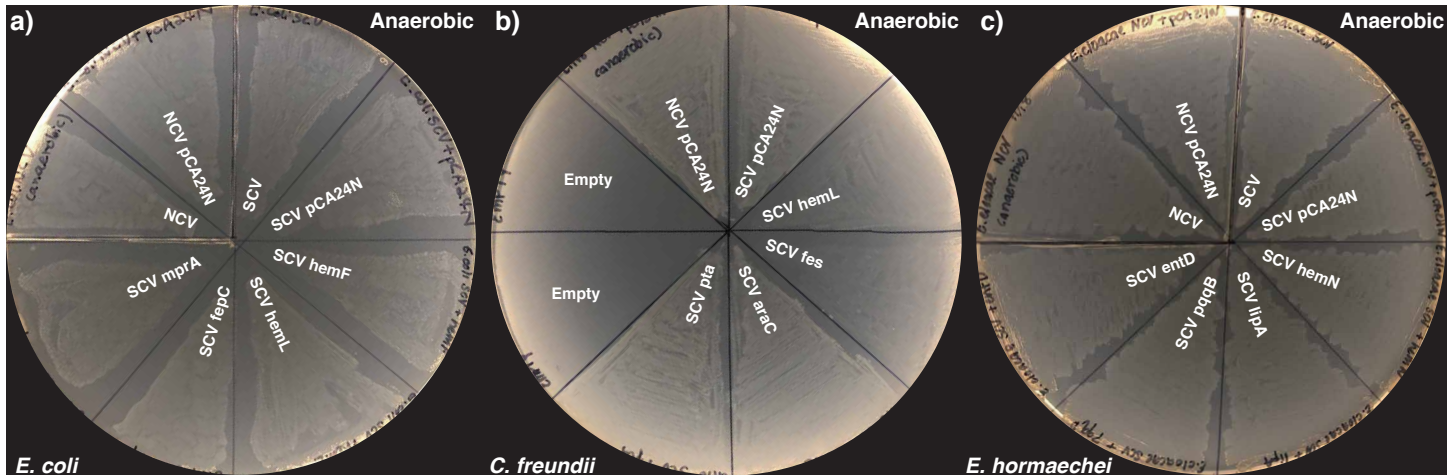

**Figure 5** - Anaerobic growth rescues growth for small colony variants in *E. coli* (A), *C. freundii* (B), and *E. hormaechei* (C) isolates.

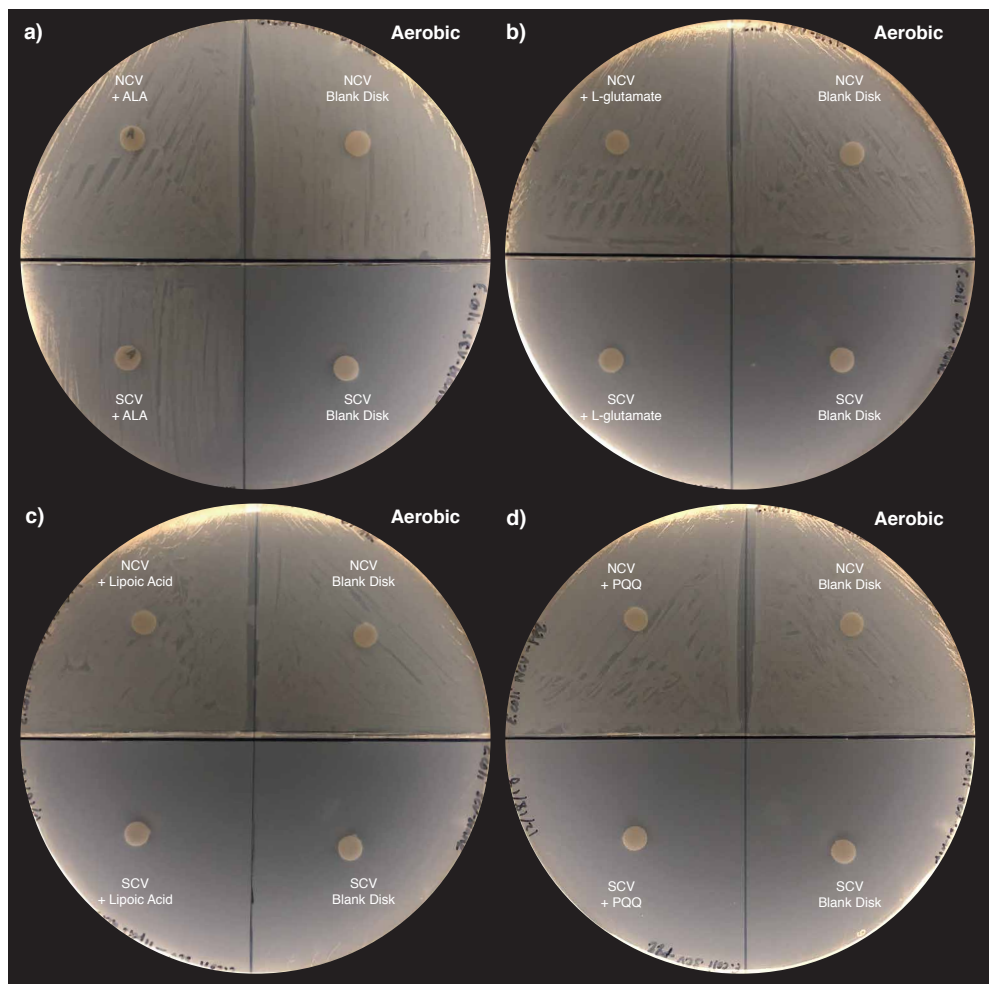

Figure S1 – Chemical rescue of *Escherichia coli* SCV growth was successful with  $\delta$ -aminolevulinic acid (a), but not with L-glutamate (b), lipoic acid (c), or pyrroloquinoline quinone (d).

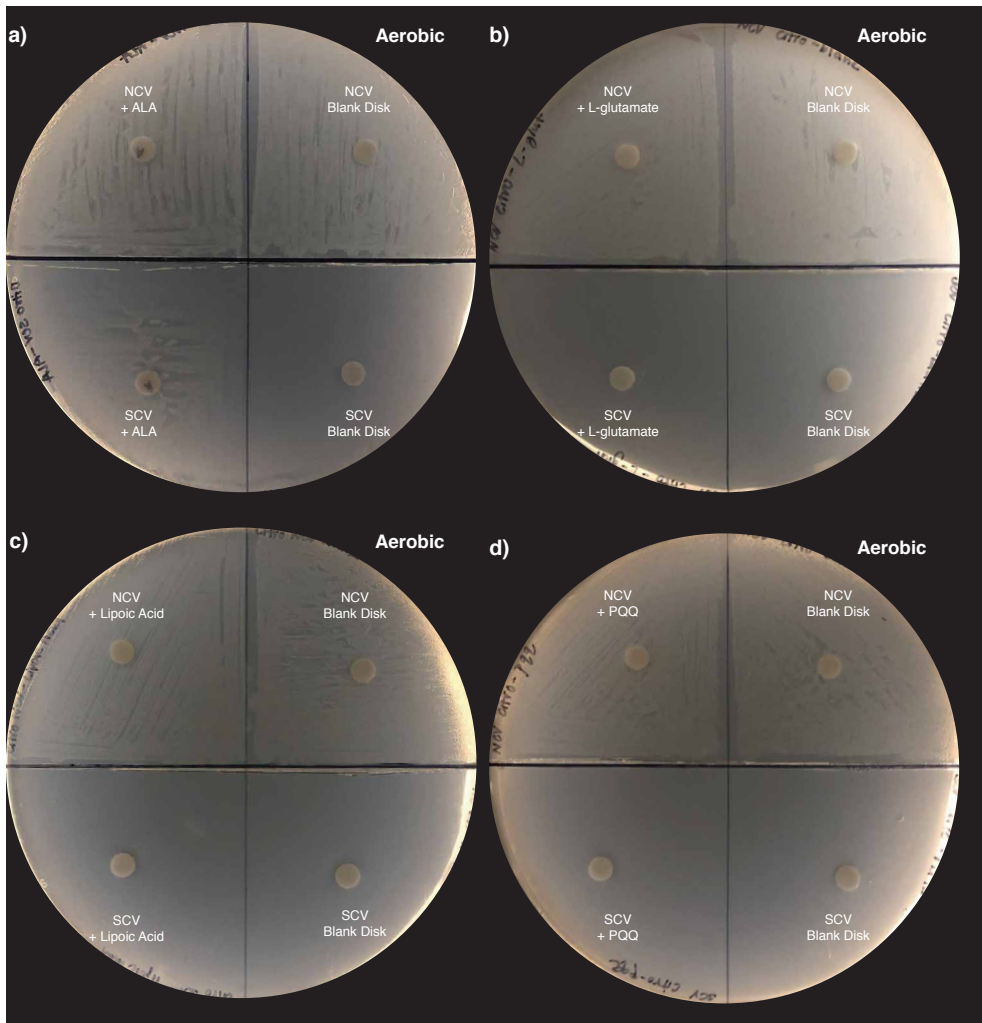

Figure S2 – Chemical rescue of *Citrobacter freundii* SCV growth was successful with  $\delta$ -aminolevulinic acid (a), but not with L-glutamate (b), lipoic acid (c), or pyrroloquinoline quinone (d).

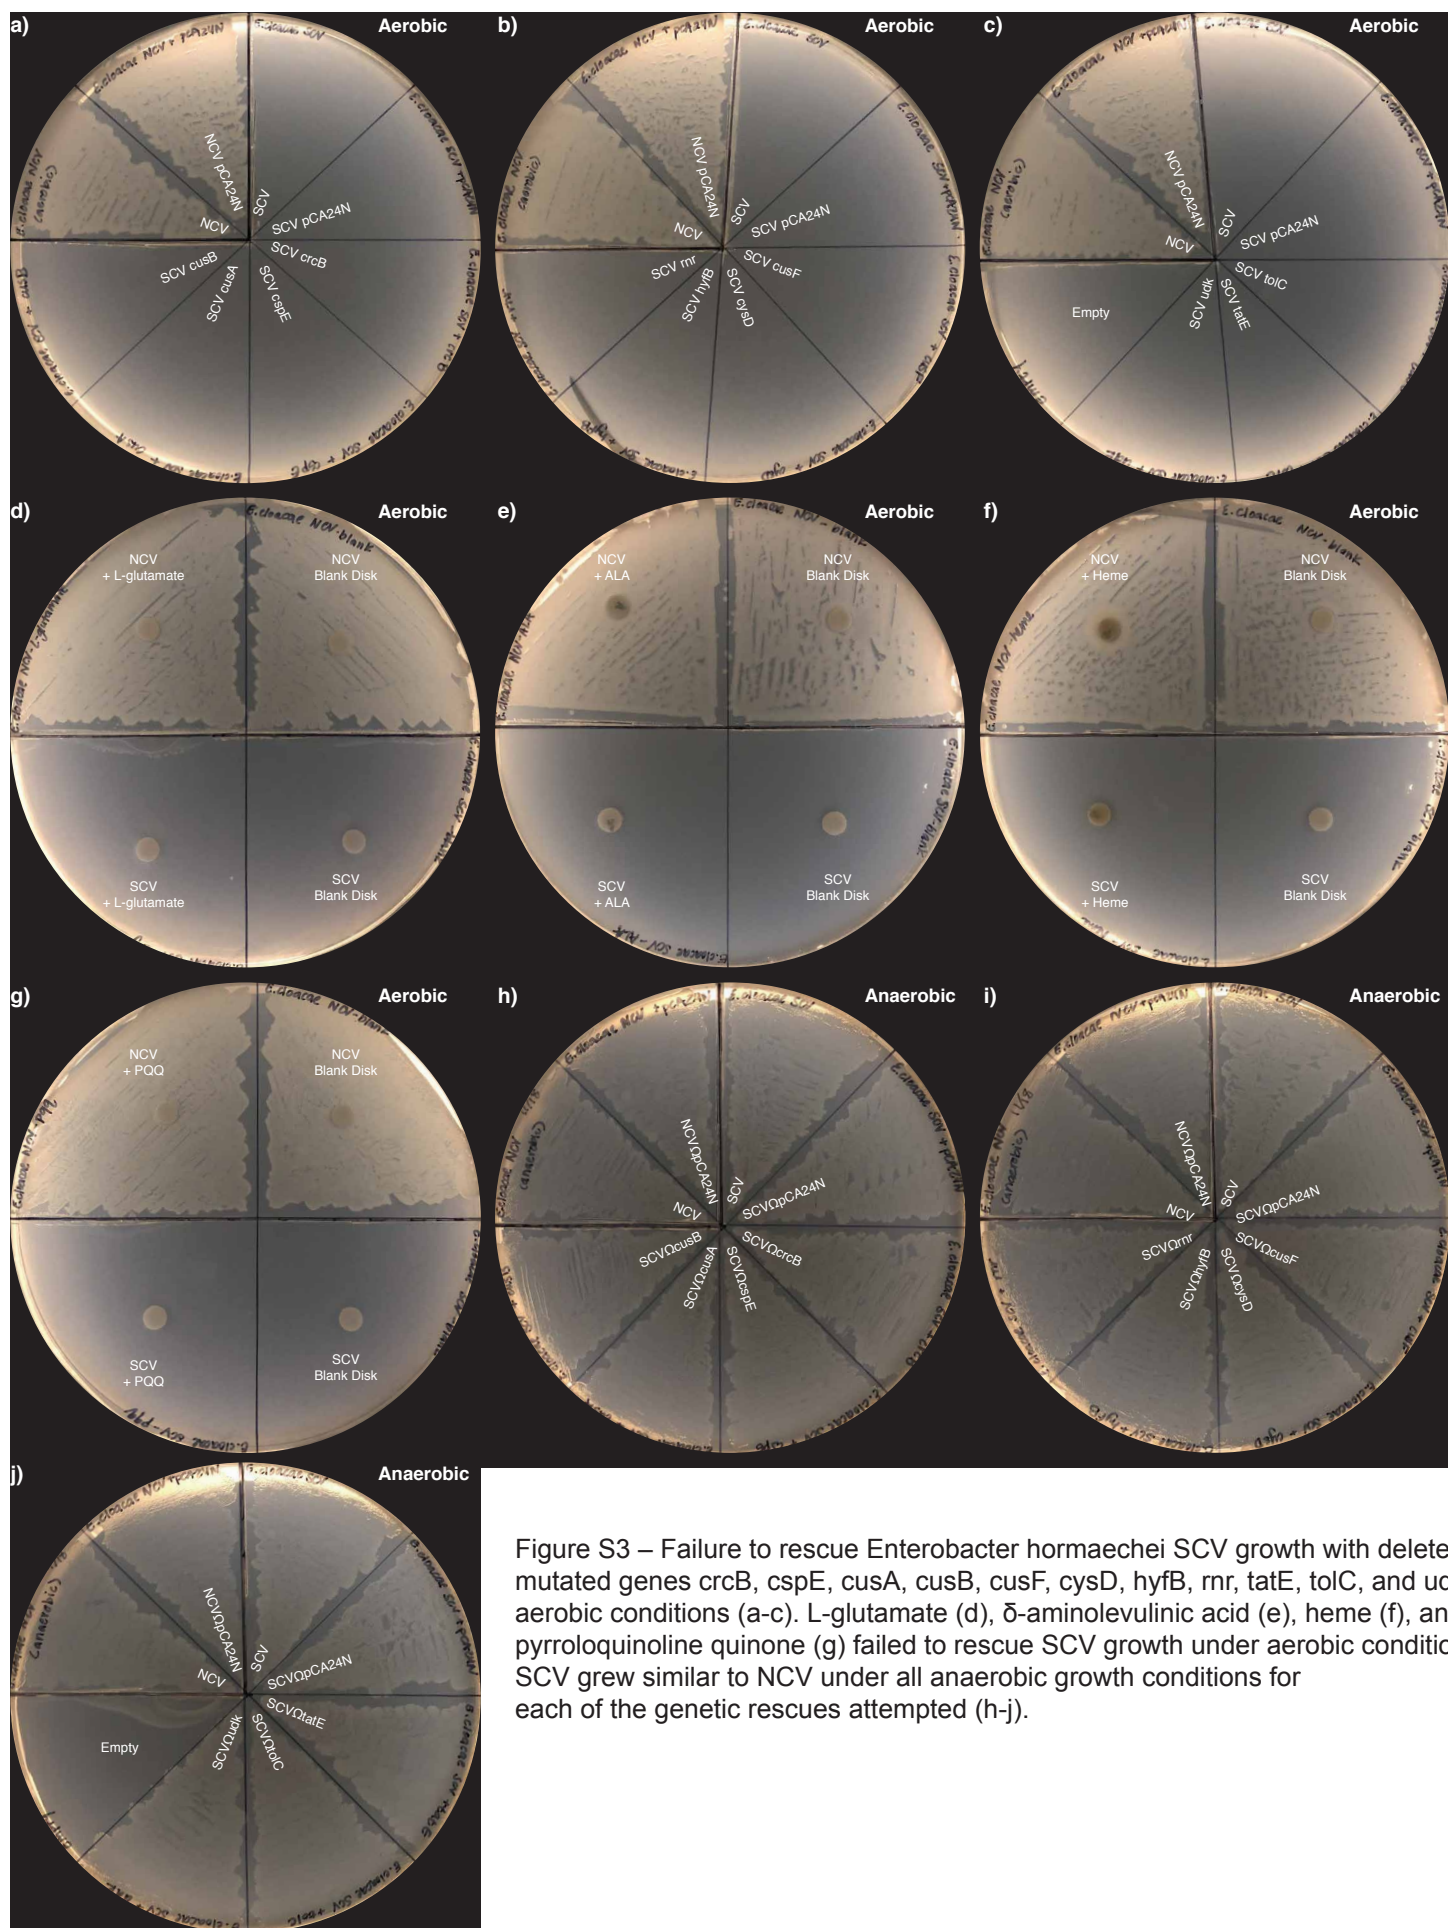

Figure S3 – Failure to rescue *Enterobacter hormaechei* SCV growth with deleted and mutated genes *crcB*, *cspE*, *cusA*, *cusB*, *cusF*, *cysD*, *hyfB*, *rnr*, *tatE*, *tolC*, and *udk* under aerobic conditions (a-c). L-glutamate (d),  $\delta$ -aminolevulinic acid (e), heme (f), and pyrroloquinoline quinone (g) failed to rescue SCV growth under aerobic conditions. SCV grew similar to NCV under all anaerobic growth conditions for each of the genetic rescues attempted (h-j).
